1     **Chromosomal inversions facilitate chromosome-scale evolution in**  
2                             ***Anopheles funestus***  
3

4     Caroline Fouet<sup>1\*</sup>, Colince Kamdem<sup>1</sup>, Bradley J. White<sup>1,2\*</sup>

5     <sup>1</sup>Department of Entomology, University of California, Riverside, CA 92521

6     <sup>2</sup>Center for Disease Vector Research, Institute for Integrative Genome Biology,  
7     University of California, Riverside, CA 92521

8     \*Corresponding authors: caroline.fouet@ucr.edu; bradley.white@ucr.edu  
9

# Abstract

Understanding the neutral and selective forces that shape the genetic diversity along chromosomes is one of the central goals of evolutionary genomics. Contrary to expectations, combined actions of recombination and selection can result in reduced diversity along an entire chromosome, but this hypothesis still lacks strong empirical supports. Here we show that nucleotide diversity is specific to chromosome arms in the African malaria mosquito *Anopheles funestus*. We analysed the population history and genetic diversity in 132 wild-caught individuals representing two diverging ecotypes using RADseq markers. Genome scans revealed that genetic differentiation between ecotypes is accumulated within segregating polymorphic chromosomal inversions. Importantly, the presence of multiple overlapping inversions is associated with strong reductions in diversity throughout entire chromosome arms. The depression in genetic diversity is correlated to the frequency of inversions, being stronger in forest populations that are fixed for several adaptive inversions. Our results emphasize the role of polymorphic inversions in the genome architecture of adaptive speciation in *An. funestus* and provide a case of chromosome-scale evolution associated with the interplay between population demography, selection and recombination.

**Key words:** Divergent selection, chromosomal inversion, recombination, nucleotide diversity

## Introduction

Investigating the population history and genetic diversity in emerging species should provide important insights into the genomic architecture of speciation driven by natural selection (Nosil 2012). Advances in genomics now allow robust descriptions of genetic diversity along chromosomes in almost any living organism (Davey et al. 2011; Ellegren 2014). However, while obtaining detailed estimates of genomic diversity has become very common, the evolutionary signals that contribute to shape this diversity remain difficult to understand. In principle, patterns of diversity that are consistent throughout the genome are generally thought to result from neutral demographic processes. In contrast, signatures of recombination and those of positive or negative selection are expected to be restricted to more or less small portions of chromosomes (O'Reilly et al. 2008). A vast majority of the massive genome scans that are accumulating owing to increased availability of high-throughput sequencing largely support this view (Hohenlohe et al. 2010; Lawniczak et al. 2010; Nielsen et al. 2011; Via 2012; Gagnaire et al. 2013; Kamdem et al. 2016). The known exceptions include rearranged chromosomal regions of chromosomes and collinear regions around the centromere and the telomere where disproportionately depressed levels of polymorphism due to low recombination can extend over several megabases (Neafsey et al. 2010; Ellegren et al. 2012; Marsden et al. 2014). However, in reality, the nature of the genetic diversity across genomes can be more complicated to explain than this, mainly because of the potentially confounding signals produced by several neutral and selective forces. For example, analyses of genetic variation in several *Drosophila*

species have revealed widespread footprints of purifying selection across the genome (Sella et al. 2009). Likewise, recurrent bottlenecks can obscure signals of positive selection (Chang and Hartl 2014). Further, the power to detect molecular signatures of natural selection varies depending on whether the demographic history is explicitly taken into account or not (Huber et al. 2014). Overall, the dichotomy between localized effects of selection/recombination and genome-wide effects of demography is sufficient to explain common patterns of genetic diversity along chromosomes, but it is much less straightforward to judge when the evolutionary history of the species is too complex or when diversity is altered over extremely large portions of the genome.

One example of these puzzling scenarios involves patterns of nucleotide diversity that are specific to whole chromosomes or chromosome arms. Reduced diversity on sex chromosomes relative to the rest of the genome is common and well documented in the heterogametic sex (Ellegren 2009). This discrepancy is largely due to neutral effects since the effective population size of sex chromosomes is lower in the heterogametic sex, but can also in some cases be correlated to widespread selection along the chromosome (e.g., the Y chromosome of humans) (Wilson Sayres et al. 2014). In contrast, autosome-specific diversity is very unusual, more difficult to explain, and certainly involves a complex interplay between drift, selection and recombination that is yet to be elucidated. The strongest evidence of autosome-specific diversity so far comes from *Drosophila* (Kulathinal et al. 2009; Corbett-Detig and Hartl 2012; Pool et al. 2012). Genome scans of worldwide

78 populations of *Drosophila melanogaster* revealed that some populations have either  
79 reduced or elevated nucleotide diversity specific to autosomal arms (Corbett-Detig  
80 and Hartl 2012; Pool et al. 2012). Interestingly, both the elevation and the reduction  
81 of diversity along a chromosome relative to the rest of the genome are due to the  
82 presence of inversions (Pool et al. 2012). Chromosomal inversions have been the  
83 focus of intense research for several decades and their role in local adaptation and  
84 speciation is widely recognized (Hoffmann and Rieseberg 2008; Kirkpatrick 2010).  
85 Notably, frequencies of certain inversions match latitudinal clines in flies and  
86 mosquitoes providing strong evidence of divergent selection on alternative  
87 karyotypes (Coluzzi et al. 2002; Hoffmann and Rieseberg 2008; Ayala et al. 2011).  
88 The explicit selective mechanisms at play within chromosomal inversions remain  
89 poorly elucidated. It has been suggested that inversions reduce local recombination  
90 and bring adapted alleles into closer physical association, which causes their spread  
91 in favourable environments (Kirkpatrick 2010; Lohse et al. 2015). Despite their  
92 importance as a major mechanism for reorganizing the genome, little progress has  
93 been made towards understanding how and why inversions evolve. Even though the  
94 generalization across taxa remains insufficient, the recent realization that inversions  
95 affect sequence polymorphism not only within their physical limits but also  
96 chromosome-wide reminds us that their impacts in genome evolution are perhaps  
97 far more complex than we dare suppose. The fine-scale examination of genetic  
98 diversity along chromosomes of species bearing numerous well-characterized  
99 polymorphic chromosomal inversions will provide crucial insights into the physical  
100 extent of selective processes in and around inversions.

101  
102 Mosquitoes of the genus *Anopheles* provide an excellent opportunity for studying the  
103 dynamics of genome evolution during speciation. The short generation time allow  
104 the accumulation of recombination events that can be easily observed. Recent  
105 adaptive processes can also be investigated within clades with large effective  
106 population sizes and rapid divergence (Donnelly et al. 2001; Coluzzi et al. 2002;  
107 Sinka et al. 2010; Kamdem et al. 2012; Kamdem et al. 2016). Further, the  
108 evolutionary proximity of anopheline mosquitoes with *Drosophila* flies allows  
109 comparisons based on data from some of the best-studied model species.  
110 Importantly, *Anopheles* species appear particularly attractive to understand the role  
111 of inversions on the evolution of chromosomes because of the presence of hundreds  
112 of inversion polymorphisms and strong karyotypic variability among and within  
113 species (Sharakhova et al. 2011).

114  
115 In this paper, we focused on *Anopheles funestus*, the second most important vector of  
116 human malaria parasites in Sub-Saharan Africa. This highly anthropophilic mosquito  
117 is splitting into at least two ecotypes widespread across the continent (Michel et al.  
118 2005; Ayala et al. 2011; Coetzee and Koekemoer 2013; Dia et al. 2013).  
119 Microsatellites and cytogenetic analyses suggest that chromosomal inversions have  
120 played a crucial role in the adaptive evolution of *An. funestus* (Ayala et al. 2011).  
121 Indeed, not only an impressive number of polymorphic chromosomal inversions  
122 have been identified in the polytene chromosome, but gradients of inversion  
123 frequencies are well characterized in natural populations of *An. funestus* (Sharakhov

et al. 2004; Ayala et al. 2011; Dia et al. 2013). The main goal of this study was to use Next Generation Sequencing to characterize targets of selection in the *An. funestus* genome. We investigated the genomic architecture of divergence and selection in the two ecotypes using ~10,000 SNP markers identified with RAD sequencing. We conducted genome scans in 132 individuals from Cameroon and we showed that strong signatures of divergent selection are clustered within two major polymorphic inversions. We found that strong selection and low recombination in inversions result in reduced diversity throughout entire chromosomal arms supporting the idea of a chromosome-scale evolution facilitated by the presence of rearrangements.

## Results

### SNP genotyping

We sequenced 132 *An. funestus* mosquitoes collected from two locations separated by ~500km (Fig. 1A, Table S1). Mfou is a small city belonging to the southern forest region. *An. funestus* breeds in an artificial lake and maintain abundant populations throughout the year across the city. Tibati lies within the forest-savannah transition zone. Likewise, several artificial lakes provide abundant breeding sites for dense and perennial populations of *An. funestus* in this village. Using alignments to the draft reference genome, we identified 490,871 unique 96-bp RAD loci. We removed loci that were not present in all populations and in at least 60% of individuals within every population and we randomly selected one SNP identified within these loci resulting in 10687 high-quality biallelic markers.

### Genetic and geographic differentiation

Based on 10687 genome-wide SNPs, the NJ tree and the first three PCA axes clearly distinguished two genetic clusters corresponding presumably to the two subgroups previously described in Cameroon and across the continent with microsatellites and inversion polymorphism markers (Cohuet et al. 2005; Michel et al. 2005; Ayala et al. 2011) (Fig. 1B). In Cameroon, in particular, populations of *An. funestus* are spread along a latitudinal cline of about 1500km and bear tens of polymorphic inversions, but remain weakly differentiated (Cohuet et al. 2005; Ayala et al. 2011). Both the method of Evanno et al and the DAPC confirmed the existence of only two to three demes corresponding to the forest and the savannah ecotypes among our samples (Fig. 1D,E). Despite this subdivision, the overall genetic differentiation is low ( $F_{ST} =$



0.033,  $p < 0.005$ ) between the two subgroups and a STRUCTURE analysis with  $k = 2$  simply depicts a single population with admixed ancestry rather than two distinct subunits. The moderate geographic differentiation is also reflected by the results of an AMOVA, which shows that the most significant proportion of the genetic variance (98.2%) among our samples is explained by within-individual variations. The geographic origin explained less than 2% of the genetic variance, confirming that extensive gene flow among populations overwhelms ongoing local adaptations. The low number of sampling locations can be a handicap for the interpretation of patterns of genetic structure we observed. However, our sampling includes the two main subdivisions described in *An. funestus* with a variety of genetic markers and thereby provided an unbiased picture of the genetic differentiation of this species in West Africa.

# **Evidence for strong divergent selection in chromosomal inversions**

We estimated and plotted the locus-specific  $F_{ST}$  along the pseudochromosomes to assess the genomic differentiation between ecotypes and identify outlier loci. First, using 10687 SNPs, we observed a non-random distribution of highly differentiated sites, characterized by an aggregation of the highest  $F_{ST}$  values in genomic regions bearing known polymorphic chromosomal inversions (Fig. 2). Using the 99% cutoff, we identify 876 outliers of  $F_{ST}$  throughout the genome, 31 of which were mapped to concatenated scaffolds and were confirmed as statistical outliers in LOSITAN. All these outliers resided on chromosomes 3R and 2R, which also concentrate the highest number of polymorphic inversions identified in the *An. funestus* (Fig. 2, S1). We also noted an imbalance in the number of outliers between the 2R and 3R (9

against 22, respectively) implying that inversions located on the 3R are the most significant in local adaptation. The strong divergence of inversions and inverted chromosomes is particularly evident in the genomic distribution of  $d_{xy}$  and fixed differences. In keeping with  $F_{ST}$  values, the highest values of  $d_{xy}$  are clustered within the 3Ra and 3Rb inversions on the 3R chromosome arm (Fig. 3), which further emphasizes the role of these two large inversions in ecological divergence. Unsurprisingly, the 3R arm has by far the highest proportion of fixed differences among autosomes. Finally, two distinct peaks of both  $d_{xy}$  and  $d_f$  can be clearly identified in regions corresponding to the 3Ra and 3Rb inversions (Fig. 3).

To further assess the magnitude of the role of inversions in adaptive divergence, we performed NJ analyses separately for each chromosome arm as well as four different inversions (2Rh, 3Ra, 3Rb and 3Rd). As expected, the inverted chromosome 3R and to a lesser extent the 2R reproduced the segregation between ecotypes observed with genome-wide SNPs (Fig. 4). Most notably, variations within the 3Ra inversion assigned 100% of individuals to their respective ecotypes, and the 3Rb also separated a significant proportion of individuals whereas the two populations were not discriminated by SNPs from regions outside the two inversions (Fig. 4). In contrast, the two inversions, 2Rh and 3Rd, had no discriminatory power, which confirmed that the 3Ra and 3Rb, and especially the 3Ra, are the two main targets of divergent selection. This strong selection translates into  $F_{ST}$  values, which increase from 0.033 genome-wide to 0.08 within the 2Rb inversion and reach 0.22 within the 3Ra inversion. Finally, the crucial role of the two inversions in the geographic structuring of the genetic diversity in *An. funestus* is

also reflected by the drastic increase in the proportion of the genetic variance explained by the geographic origin of samples within inversions. This proportion rises from 1.8% for the genome-wide SNPs to 4.7% and 12.9% when only variants included in the 3Rb and the 3Ra inversions, respectively, are used. Overall, our results provide multiple lines of evidence that strong signatures of spatially varying selection are clustered within polymorphic chromosomal inversions in a moderately differentiated genomic background in *An. funestus*.

### **Chromosome arm-specific diversity associated with inversions**

To further characterize the signatures of selection, we conducted genome scans using estimates of nucleotide diversity ( $\theta_{\pi}$  and  $\theta_w$ ) and Tajima's  $D$  (Fig. 5). Surprisingly, there was no obvious depression in diversity and Tajima's  $D$  within the 3Ra and the 3Rb inversions relative to the rest of the genome as could be expected due to strong divergent selection observed within these inversions. Instead, we noted that, in contrast to  $\theta_{\pi}$  that is fairly constant across the entire length of all chromosomes,  $\theta_w$  varies significantly between chromosome arms (Fig. 5, 6). The highest values of  $\theta_w$  are concentrated on the uninverted chromosome 2L, and there are statistically significant (Wilcoxon rank sum test,  $p\text{-value} < 0.001$ ) differences in nucleotide diversity between the 2L and each of the 3 other autosomes (Fig. 6). Precisely, inverted autosomes showed reduced average  $\theta_w$  of 34.1% for the 3R, 24.0% for the 2R and 13.2% for the 3L relative to the 2L arm. The X chromosome bears no known inversion, but presumably because of its particular divergence and distorted effective size, the average  $\theta_w$  diversity was also weaker relative to the 2L arm (21.1% reduction relative to the 2L). Before examining the biological meaning

of these particular patterns of genetic diversity, we conducted several tests to insure that uncertainties associated with our sequencing and analytical approach cannot account for the observed chromosomal-scale disparities. First, we compared the distribution and lengths of mapped scaffolds and we confirmed that every chromosome arm was represented by a substantial number of scaffolds (Table S2 and Fig. S2). The length of pseudochromosomes was also proportional to the actual length of chromosomes, ranging from 6.8 Mb on the X chromosome (the smallest) to 27.4 Mb on the 2R (the largest). Therefore, we excluded the possibility that the chromosome-bias diversity was due to a systematic error associated with the reference sequence. Further, mapped scaffolds were evenly distributed along all chromosomes, suggesting that inconsistencies in genome-wide diversity were not linked to centromere or telomere-proximal effects (Fig. S1). Second, although our estimates of genetic diversity were derived using a “low coverage approach” designed to alleviate the uncertainty associated with low sequencing depth (Korneliussen et al. 2013; Korneliussen et al. 2014), we examined the distribution of the average depth of coverage along chromosome arms to insure that the chromosome-specific diversity was not correlated to inconsistent sequencing across the genome. We ruled out this possibility because the mean depth of sequencing coverage per mapped scaffolds was consistent along all the five chromosome arms (Fig. S2). As a result, the intriguing pattern of chromosome arm-specific diversity observed in *An. funestus* genome clearly has a biological meaning. Below, we are using several analyses to better understand this process.

First,  $\theta_w$ , which varies between chromosomes, is an estimate of the number of segregating sites also known as the population scaled mutation rate and represents the “raw” amount of polymorphisms in one population. In theory, the drastic variability in average polymorphism between inverted and uninverted autosomes can be due to a correspondingly low mutation rate on inverted chromosomes. However, as shown in other insect species (Keightley et al. 2015), such an important variability in mutation rates *per se* between chromosomes is very unlikely. Also, neutral processes such as the variation of effective size among chromosomes often observed between autosomes and the sex chromosome cannot solely explain our findings since all individuals possess all autosomal arms. Our results are most likely due to a combination of recombination and selective events, and probably other more stochastic forces that differ significantly between inverted and uninverted chromosome arms. The distribution of the neutral recombination rate remains unknown in the genome of *An. funestus*, but it is widely acknowledged that recombination is rare within inversions compared with genome-wide backgrounds and that this low crossover rate can also extends beyond the limits of inversions (Hoffmann and Rieseberg 2008). Therefore, the autosomal arms bearing polymorphic inversions presumably have average recombination rates that are substantially lower than that of the 2L. The strong correlation between reduced recombination and depressed diversity is both conceptually obvious and largely documented by empirical evidence.

We have also provided compelling evidence of strong signatures of divergent selection on adaptive inversions in *An. funestus*, notably the peaks of  $d_{xy}$  and fixed

270 differences observed in the loci of the 3Ra and 3Rb inversions. As we noted  
 271 previously, it is hard to tell from our genome scans if there is a specific reduction of  
 272 polymorphism within the 3Ra and the 3Rb inversion loci, but the low recombination  
 273 and strong selection should clearly lead to lower nucleotide diversity. Although we  
 274 can explain the depression in polymorphism expected within inversions by  
 275 straightforward recombination and selective mechanisms, we however lack a  
 276 comprehensive understanding of the processes that extend this diversity reduction  
 277 beyond the limits of the inversions. This intriguing pattern of chromosome-scale  
 278 reduction in diversity has been described only in several species of *Drosophila* and is  
 279 hard to explain through common paradigms like the selective sweeps and cold spots  
 280 of recombination. Further studies will be needed to clarify different hypotheses in  
 281 *An. funestus* in particular. In the first place, a direct comparison of diversity and  
 282 long-range linkage disequilibrium between inversion-bearing haplotypes and  
 283 standard uninverted haplotypes from a sympatric area like Tibati using a more  
 284 comprehensive genome sequencing method will be crucial to more clearly  
 285 demonstrate the association between the presence of inversions and chromosome-  
 286 scale diversity (Corbett-Detig and Hartl 2012; Pool et al. 2012). On the other hand,  
 287 more than 100 inversions have been identified in the polytene chromosome map of  
 288 *An. funestus* (Sharakhov et al. 2004), and how exactly the number and the natural  
 289 frequencies of inversions bore by an autosomal arm are important in its overall  
 290 diversity remains to be clarified. Each inverted chromosome of *An. funestus* contains  
 291 multiple overlapping inversions of large size, the greatest number of common  
 292 inversions being observed on the 2R arm (Fig. S1). It is therefore tempting to

293 imagine that perhaps selection on multiple overlapping inversions can degrade  
 294 diversity across the entire chromosome arm, but this hypothesis holds only if all  
 295 inversions are simultaneously under significant selection. Nevertheless, as  
 296 illustrated with the example of the non-recombining Y chromosome of humans,  
 297 selection may be particularly potent when there is no recombination, so that  
 298 deleterious mutations in one area of the chromosome could reduce levels of genetic  
 299 diversity across the entire chromosome (Wilson Sayres et al. 2014). Likewise, if  
 300 recombination is rare along entire chromosomal arms in *An. funestus* because of the  
 301 presence of multiple overlapping inversions, a strong selection within a single  
 302 inversion is sufficient to reduce genetic polymorphism across the chromosome arm.  
 303 Our findings have revealed obvious footprints of spatially varying selection only  
 304 within the 3Ra and 3Rb, which represent ~50% of the length of the 3R arm, but we  
 305 can not exclude that other inversions may also be subjected to strong divergent  
 306 selection at other spatial scales throughout the species' range. For instance, the 2Ra  
 307 and 3La inversions are widespread in continental populations and are suspected to  
 308 provide selective advantage in certain environments (Dia et al. 2013). Rare and  
 309 endemic inversions like the 2Rt, 2Rh and 2Rd may also be strong targets of local  
 310 selection in some settings (Ayala et al. 2011). Further studies will focus on using  
 311 more extensive sampling to examine the adaptive status as well as the footprints  
 312 and strengths of positive or negative selection in other common and rare inversions  
 313 in *An. funestus*.  
 314 Finally, we noted variations in patterns of chromosome-scale diversity between  
 315 Mfou and Tibati samples consistent with perceptible differences in the population

316 demographic history despite high overall gene flow between ecotypes, which raise  
317 the question of the contribution of stochastic processes in the creation of  
318 chromosome-specific diversity. Indeed, the average genome-wide  $\theta_w$  is 1.3 greater  
319 in Tibati than in Mfou populations. The reduction of nucleotide diversity on inverted  
320 autosomes relative to the 2L is also stronger in Mfou compare with Tibati samples.  
321 The drop of the average  $\theta_w$  of inverted chromosomes relative to the 2L is 34.7% on  
322 the 3R, 29.2% on the 2R and 13.2% on the 3L in Mfou and 33.5% on the 3R, 18.8%  
323 on the 2R and 13.2 on the 3L in Tibati. This difference likely reflects the spatial  
324 variation in the intensity of selection within inversion since forest populations  
325 (Mfou) are fixed for the major polymorphic chromosomal inversions (notably the  
326 3Ra and 3Rb) whose frequencies fluctuate in Tibati (savannah) (Cohuet et al. 2005;  
327 Ayala et al. 2011). The effective size should also be reduced on inverted related to  
328 uninverted chromosome because selection on inverted chromosome lowers the  
329 number of individuals carrying certain polymorphisms. We address this particular  
330 aspect later in this section by fitting different growth models on Site Frequency  
331 Spectra (SFS) of the different autosomal arms. Beside obvious indirect effects of the  
332 specific demographic history of chromosome arms on their diversity, it remains to  
333 be determined if the population-level demography have any impact on  
334 chromosome-scale evolution. Both the overall diversity ( $\theta_w = 0.0083$  and  $\theta_\pi =$   
335  $0.0042$  in Mfou;  $\theta_w = 0.0097$  and  $\theta_\pi = 0.0043$  in Tibati) and the percentage of sites  
336 that are polymorphic within populations (64.0 % in Mfou and 65.2% in Tibati)  
337 suggest that *An. funestus* is a highly polymorphic species. As a result, it is also crucial  
338 to understand how important is a population expansion that maintains high



baseline genome-wide diversity to chromosome-specific diversity. To infer the demographic history of our populations, we first examined the genome-wide distribution of allele frequency spectra, summarized as Tajima's  $D$  (TD). Values of TD ranged from -2.47 to -1.58 among Tibati samples and from -2.20 to -1.19 in Mfou and were shifted towards negative values as expected in case of recent population expansion leading to an accumulation of low-frequency variants. Unsurprisingly, TD is more negative on the 2L chromosome in both ecotypes since this chromosome freely accumulates mutations in contrast to inverted chromosomes that are constrained by strong selection. We next modeled the SFS to infer the demographic history of populations in  $\partial a \partial i$ . We used 9412 genome-wide SNPs while excluding variants located on the X chromosome to prevent the confounding effects associated with the lesser population effective size of this chromosome. We used a dataset comprising 35 samples from Tibati and 35 samples from Mfou selected based on the best sequencing coverage criterion. We found that a population expansion model matched the average observed levels of autosomal polymorphism in both Tibati and Mfou populations. The best-fit model depicts an exponential growth in Tibati and a two-epoch growth in Mfou. Model parameters depict a more important population growth in Tibati consistent with the greater genome-wide diversity observed in savannah populations (Table 1). As we mentioned previously, we also modeled the population growth on each chromosome using arm-specific SFS in  $\partial a \partial i$ . Although the true history of chromosome arms is likely explained by more complex models including drift, selection and local recombination rates, simple growth models fitted the SFS of all autosomes in both Tibati and Mfou populations. As expected, the

growth seems relatively more important on the 2L relative to inverted autosomes (Table 1). Overall, the simple growth models fitted to chromosomes do not integrally reproduce the ratio of diversity described among chromosomal arms because chromosome-specific diversity is due to compound factors as we specified before. However, these models well illustrate the fact that the 3R and to a lesser extent the 2R arm have gone through recent drastic reduction in population effective size associated with strong selection within polymorphic chromosomal inversions.

## Discussion

### Population history of *An. funestus*

We conducted the first genome-wide analysis of natural polymorphism in *An. funestus* populations, which revealed that genetic divergence between the two weakly differentiated ecotypes of this mosquito species is almost exclusively located in a few inverted segments of the genome. Moreover, strong selection and reduced recombination within these polymorphic chromosomal inversions are also associated with an unusual pattern of chromosome-specific diversity. We analyzed the genetic structure of populations from Cameroon and found that genome-wide SNPs corroborated previous results obtained with microsatellites and/or polymorphic chromosomal inversions markers. Low-resolution markers have indicated that populations of *An. funestus* globally belong to two clusters that have been sometimes called “Kiribina” and “Folonzo”: the names of two locations in Burkina Faso where the subgroups were described for the first time (Cohuet et al. 2005; Michel et al. 2005; Ayala et al. 2011; Dia et al. 2013). In Cameroon, an intensive sampling including 305 sites along a north-to-south transect and subsequent examination of the genetic structure with microsatellites and several polymorphic inversion loci showed that *An. funestus* is separated into two weakly differentiated subgroups corresponding probably to Kiribina and Folonzo (Ayala et al. 2011). Our detailed genome-wide analysis with more than 10000 SNPs is in perfect agreement with this study. PCA, Neighbor-joining trees and Bayesian clustering confirmed the segregation based on the geographic origin (the savannah against the forest). A massive ongoing gene flow and a weak genetic differentiation

between the two ecotypes translate into values of  $F_{ST}$  near zero. As a result, we emphasize that the putative subgroups of *An. funestus* are far from incipient species, but represent at best two ecotypes at early stages of genetic divergence. Additionally, as we document further in the next paragraphs, populations of *An. funestus* are globally undifferentiated even at the genomic level except within loci of a few polymorphic chromosomal inversions. The consistent subdivision observed across the species range is primarily a translation of karyotypic variability along geographic clines of these inversions. *An. funestus* larvae breed almost exclusively in lakes that are most of the time artificial lakes created by human activity in geographically distant locations. In Cameroon, historic populations of *An. funestus* are generally observed around a network of ~5 relatively isolated artificial lakes (Fig 1A). Our findings and previous studies (Cohuet et al. 2005; Ayala et al. 2011) show that this apparent lack of connectivity among populations does not prevent a massive gene flow.

The distribution and genetic structure of *Anopheles* populations across microhabitats and time scales is markedly heterogeneous, especially among leading African malaria vectors. This heterogeneity is being exacerbated by the recent scale-up of malaria control measures including the widespread use of Insecticide-Treated Nets (ITNs) and the multiplication of indoor insecticide spraying campaigns to which mosquito populations respond by shifting their spatial and temporal distributions (Derua et al. 2012; Mwangangi et al. 2013). With regard to *An. funestus* precisely, a detectable change in the nocturnal biting cycle has been noticed in West and East Africa after the scale-up of mosquito nets ownership and use (Moiroux et

al. 2012). These shifts may lead to the emergence of cryptic subgroups if specialized populations become genetically differentiated (Riehle et al. 2011). Fortunately, our results do not indicate any genetic structure beyond the major geographic subdivisions expected within *An. funestus* populations. In Cameroon, as in many other Sub-Saharan African countries, massive ITNs distribution campaigns have been implemented recently and studies are ongoing to evaluate the short or long-term effects of these measures on vector populations (Bowen 2013). We surveyed 28 locations, including historical foci of *An. funestus* population Cameroon, and we recorded the presence of the species in only two villages. This rarity may suggest a recent contraction in the distribution range of *An. funestus*, which still need to be confirmed by a careful examination of the temporal dynamics. Importantly, a high-confidence genome-scale analysis allows us to clearly emphasize that *An. funestus* has undergone no shift in its population genetic structure so far.

### **Spatially varying selection in chromosomal inversions**

We estimated locus-specific population differentiation using the Weir and Cockerham's unbiased estimator of the  $F_{ST}$ , the absolute sequence divergence ( $d_{xy}$ ) and the proportion of fixed differences to characterize the level of divergence at each variant site sampled across the genome. We found a strong heterogeneity in genetic divergence across the genome. Notably, despite the lack of differentiation between ecotypes ( $F_{ST} = 0.033$ ), more than 5% of SNPs have disproportionately elevated  $F_{ST}$  ( $F_{ST}$  outliers). Importantly, these  $F_{ST}$  outliers are exclusively found on two of the five chromosome arms (2R and 3R), especially within two segregating inversions (3Ra and 2Rb). The genome-wide organization of genetic divergence

during speciation has been increasingly examined in diverse taxa, but the conclusions remain contentious. Two concurrent models have been proposed to explain the architecture of genetic divergence and reproductive isolation along genomes of emerging species. The genetic divergence is thought to be either “heterogeneous”, meaning that genomic regions of high differentiation are scattered throughout the genome, or “restricted” when only a few regions that have been sometimes called “speciation island” bear signatures of strong divergence (Nosil and Feder 2012; Nosil and Feder 2013). Empirical data support the existence of both models at unknown frequencies in nature (Lawniczak et al. 2010; Nosil and Feder 2012; Roesti et al. 2012; Andrew and Rieseberg 2013; Nosil and Feder 2013; Renaut et al. 2013). However, divergence is clearly focused on few genomic regions early in speciation due to localized effects of natural selection (Andrew and Rieseberg 2013). During the speciation process, when the ecological and genetic segregation between splitting lineages becomes significant, the combination of selective and demographic processes expands the genetic divergence throughout the genome. Moreover, it is very common to find high levels of genetic divergence that are accumulated in regions of low recombination especially at early stages of speciation (Andrew and Rieseberg 2013). Based on our findings, *An. funestus* appears as excellent model system to understand the architecture of genomic divergence at early stages of adaptive divergence. Unsurprisingly, the genomic divergence between the two undifferentiated ecotypes is restricted to a few regions of low recombination, which correspond to polymorphic chromosomal inversions in this species. Clear signals of divergent selection within two inversions translate into

463 peaks of  $F_{ST}$ ,  $d_{xy}$  and fixed differences relative to the genome-wide average. The  
 464 prime role of the two inversions in ecological divergence is also illustrated by the  
 465 fact that except these inversions, no other locus or chromosome is able to reproduce  
 466 the structuring of *An. funestus* into two populations as expected. Cytogenetic  
 467 analyses and microsatellite loci have also suggested that the 3Ra inversion may have  
 468 a central role in local adaptation in Cameroonian populations (Ayala et al. 2011).  
 469 Chromosomal inversions have been found in virtually all species that have been well  
 470 scrutinized so far (Kirkpatrick 2010). Nearly a century of research on these  
 471 chromosomal rearrangements has provided multiple lines of evidence suggesting  
 472 that strong selection governs the distribution of inversions in insects, plants and  
 473 animals (Hoffmann and Rieseberg 2008). Notably, chromosomal inversions play a  
 474 crucial role in adaptive speciation as shown in several insect species: the most  
 475 prominent examples being *Drosophila*, *Rhagoletis* and *Anopheles* (Feder et al. 2003;  
 476 Ayala and Coluzzi 2005; Rane et al. 2015). In another African malaria mosquito, *An.*  
 477 *gambiae*, known for its reticulate speciation leading to numerous cryptic species and  
 478 emerging subgroups, high levels of genetic differentiation are also accumulated in  
 479 selective sweeps found within segregating polymorphic chromosomal (Kamdem et  
 480 al. 2016), especially the 2La inversion involved in resistance to aridity (Cheng et al.  
 481 2012). Likewise, inversions are responsible for the majority of the genetic structure  
 482 observed in cosmopolitan populations of *Drosophila melanogaster* (Corbett-Detig  
 483 and Hartl 2012; Pool et al. 2012). Chromosomal rearrangements are also involved in  
 484 adaptation to new host plants and sympatric speciation in *Rhagoletis pomonella*  
 485 (Feder et al. 2003). Inversions are thought to contribute to the spread of

combinations of favourable alleles because recombination is suppressed between the inverted sequence and standard karyotype, leading to divergence between inversions and homo-sequential regions and the potential for evolution of coadapted gene complexes (Kirkpatrick and Barton 2006; Hoffmann and Rieseberg 2008). One of the direct effects of low recombination within inversion is also to minimize the competition that can occur between loci under selection to reduce diversity across their nearby linked loci (Hill–Robertson effect) (Comeron et al. 2008). These combined actions of recombination and selection then result in a population effective size that is considerably reduced within inversions relative to genomic regions with higher recombination. In principle, selection in inversions can be either strong and infrequent or weak and common, but empirical supports about the type and magnitude of selection within inversions remain rare. However, impressive clines of inversions frequencies observed in natural populations, especially in *Drosophila* and mosquitoes illustrate the powerful effects of recombination and selection within inversion in genomic divergence.

# **Chromosome-scale evolution**

The genetic hitchhiking model (Via 2012) well explain the reduced diversity that can be encountered within loci of segregating inversion subjected to divergent natural selection. Beyond the accumulation of outliers of  $F_{ST}$  and other divergence metrics within the 3Ra and 3Rb inversions, we haven't observed other characteristic signals of divergent selection such as the depression of nucleotide diversity and skewed allele frequency spectrum (Fig. 5). A more sophisticated version of the reference genome assembly and annotation of *An. funestus* will allow us to conduct a more



sensitive sequential and functional characterization of footprints of selection observed within these key inversions. Presumably, as the two inversions segregate along a latitudinal gradient, genes involved in resistance to aridity or desiccation can be suspected to be among the functional classes potentially accumulated within the two inversions. In support of this hypothesis, comparative cytogenetic have revealed that the 3R chromosomal arm of *An. funestus* and the 2L arm of *An. gambiae* share a very close evolutionary history (Sharakhova et al. 2011). It is still unclear whether this chromosomal similarity is the result of a convergent evolution or something that the two species share since they diverged from their common ancestor. Importantly, the comparative cytogenetic study also stipulates that the 3Rb inversion of *An. funestus* probably correspond to the 2La inversion known to be crucial for desiccation tolerance in *An. gambiae* populations (Fouet et al. 2012). Instead of reduced diversity or skewed AFS in loci of inversions subjected to strong selection, we have found that the genetic diversity was rather specific to whole chromosomal arms. We conducted several analyses to first rule out the possibility that chromosome-bias diversity was due to errors and limits of our experimental approach. There is no simple explanation that can translate the biological meaning of chromosome-specific diversity, but our work and previous studies on *Drosophila* (Corbett-Detig and Hartl 2012; Pool et al. 2012) pinpoint the critical role of spatially varying selection and reduced recombination within chromosomal inversions as the primary catalyzers. In *An. funestus* chromosome-scale evolution of diversity is likely due to the presence of multiple overlapping inversions subjected to spatially varying divergent selection all across the geographic range of the species. The models of

population demography of our samples suggest an exponential population growth, but we do not know if high levels of genome-wide polymorphism are key to the onset of chromosome-specific diversity or not.

Chromosome-scale evolution is an emerging field of research and it is premature to provide general rules or a definitive explanation of forces that affect the genetic variation at large scales across genomes. So far, patterns of chromosome-specific diversity have been described mainly along sex chromosomes (Ellegren 2009).

Particularly, it has recently been hypothesized that the reduced diversity along the Y chromosome relative to autosomes in humans is not only due to predictable effects of a lower population effective size of the sex chromosome but also to pervasive effects of selection (Wilson Sayres et al. 2014). Precisely, the absence of recombination along the Y chromosome renders background selection particularly efficient, so that deleterious mutations in one area of the chromosome can potentially reduce levels of genetic diversity across the entire chromosome if the selection is sufficiently strong to overcome the effects of interference with neighboring loci (Hill-Robertson effect) (Wilson Sayres et al. 2014). A similar process can be possible on inverted chromosomal arms in *An. funestus* where recombination is suppressed because of the presence of multiple inversions.

The reduction of diversity due to low recombination across large portions of the genome is sufficiently documented, especially around centromeric and telomeric regions of chromosomes (Neafsey et al. 2010; Marsden et al. 2014). In plants, polyploidy and loss of recombination result in substantial reduction of diversity along large chromosomal regions (Akhunov et al. 2010). Likewise, species with low

levels of genome-wide recombination, such as highly self-fertilizing species, show reduced genetic diversity compared with their outcrossing relatives. Indeed, extensive linkage disequilibrium and low recombination due to self-fertilization are thought to interact with selection to shape chromosome-scale patterns of genetic diversity in *Caenorhabditis* (Cutter and Choi 2010; Andersen et al. 2012; Thomas et al. 2015). The really intriguing cases of chromosome-scale diversity in outcrossing species are observed so far in *Drosophila* and *An. funestus*. In *Drosophila melanogaster*, *Drosophila pseudoobscura* and related species, comparison of inversion-bearing haplotypes and individuals with standard arrangements lead to the conclusion that, in contrast to *An. funestus* where the action of overlapping inversions can be suggested, the presence of only one polymorphic inversion can drive diversity reduction or increase throughout the entire chromosome arm (Corbett-Detig and Hartl 2012; McGaugh and Noor 2012; Pool et al. 2012).

## Conclusions and implications

We described chromosome-wide diversity supporting recent evidence from *Drosophila* that genome evolution and patterns of variation at genome or chromosome-scales can be facilitated by selection and recombination within polymorphic chromosomal inversions. Our results should motivate other studies in *Anopheles* and other insect species in order to provide additional empirical support for this process, which has strong implications in our understanding of the evolutionary forces that shape genetic diversity along chromosomes. In *An. funestus*, further directions could be to improved genomic resources of this nonmodel organism, notably a recombination map and an improved version of the reference genome. This will allow a more precise understanding of the genetic variation and functional characterization of local adaptation in this mosquito. Notably, a high-quality reference genome combine with a more intensive sampling, a comprehensive genomic sequencing and additional cytogenetic studies will be crucial for mapping chromosomal inversions and karyotyping individuals across the species range. As such, we will be able to conduct direct tests for the effects of inclusion or exclusion of inversions on the genetic diversity similar to what has been done in *Drosophila melanogaster* (Pool et al. 2012). Finally, *An. funestus* is the second most important vector of human malaria parasites in Africa and investigating the genomic bases of its evolutionary diversification will be useful to assess the adaptive response of this vector to ongoing expansive insecticide-based malaria control campaigns.

## Materials and methods

### Sample collection

*An. funestus* is endemic to Africa and is structured in two genetically differentiated ecotypes distributed along a latitudinal cline with a wide contact zone (Cohuet et al. 2003; Cohuet et al. 2005; Ayala et al. 2011). We surveyed 28 locations across a north-to-south transect in Cameroon, from August to November 2013, to collect *An. funestus* specimens (Fig. 1A, Table S1). Most of the locations we visited were selected because previous surveys indicated the presence of *An. funestus* populations (Cohuet et al. 2003; Ayala et al. 2011) or because of the presence of lakes, which are typical larval breeding sites of *An. funestus*. Others were based on opportunistic sampling. We used several sampling methods to collect mosquitoes at distinct stages of the life cycle, from different microhabitats and from different time points during the nocturnal biting cycle (Service 1993). This approach maximizes the chances that our sampling represents a best approximation of the species genetic diversity. We identified *An. funestus* individuals using morphological characters and PCR (Gillies and De Meillon 1968; Gillies and Coetzee 1987; Cohuet et al. 2003).

### Library preparation and sequencing

We extracted genomic DNA of larvae and adult specimens with the DNeasy Blood and Tissue kit (Qiagen) and the Zymo Research MinPrep kit. Double-digest Restriction-site Associated DNA (ddRAD) libraries were prepared following a modified protocol of Peterson *et al.* 2012. Each library contained DNA fragments resulting from simultaneous digestion with *MluC1* and *NlaIII* restriction enzymes

and annealed to unique short nucleotide sequences (barcode adaptors) that enabled the identification of the individual associated with each read. RAD tags of individually-barcoded mosquitoes were pooled and size-selected to target 400-bp sequences that were enriched via PCR. One extremity of the resulting 400-bp RAD tags was sequenced on Illumina HiSeq2000 to generate single-end reads of 101 bp.

# **Alignment and SNP calling**

Raw reads were demultiplexed and filtered using the *process\_radtags* program of the Stacks v 1. 35 software (Catchen et al. 2013). Reads with ambiguous barcodes or restriction sites and those with low sequencing quality score (average Phred score < 33) were removed. To call and identify SNP among our sampling, we aligned the remaining high-quality reads along the *An. funestus* reference sequence using GSNAP (Wu and Nacu 2010). A maximum of five nucleotide mismatches were allowed and terminal alignments prevented. We used Stacks v 1. 35 to identify polymorphisms and to call SNPs within each RAD locus. Following assembly and genotyping, the polymorphism data was further filtered to maximize data quality. We retained only one randomly selected SNP per RAD locus and we kept only loci scored in every population and in at least 60 % of individuals within population for further analyses. We created SNP files in different formats using the *populations* program in Stacks v 1. 35, PLINK and PGDSPIDER (Purcell et al. 2007; Lischer and Excoffier 2012; Catchen et al. 2013). We checked the depth of sequencing coverage of the final data set after all filtering steps using VCFtools (Danecek et al. 2011). The *An. funestus* draft genome assembly we used consisted of 12,243 scaffolds ranging from 2,334 to 3,334,433 bp in length. Therefore, to perform genome scans and to effectively

identify footprints of selection throughout the genome, we placed SNPs on the five *An. funestus* chromosome arms using 104 scaffolds that had been physically mapped to chromosome (Neafsey et al. 2015). Mapped scaffolds corresponded to 7% in number and 33% in length of all *An. funestus* scaffolds (Table S2).

## **Population structure and genetic divergence**

We analyzed the genetic structure of populations with a Principal Component Analysis (PCA), neighbor-joining (NJ) trees and the STRUCTURE v 2.3.4 software (Pritchard et al. 2000). PCA and NJ analysis were performed respectively with the packages *adeigenet* and *ape* in R (Paradis et al. 2004; Jombart 2008; R Development Core Team 2014). In STRUCTURE, we ran five replicates of 1 to 10 assumed clusters (k). Each run consisted of 200,000 iterations and the first 50000 iterations were discarded as burn-in. CLUMPP v1.1.2 (Jakobsson and Rosenberg 2007) was used to aggregate results across multiple STRUCTURE runs and the clustering results were visualized graphically using DISTRUCT v1.1 (Rosenberg 2004). To find the number of genetically distinct clusters, we used both the Discriminant Analysis of Principal Component (DAPC) implemented in *adeigenet* and the ad hoc statistic DeltaK of Evanno et al, 2005 (Evanno et al. 2005; Earl and VonHoldt 2012).

To quantify the extent of the genetic differentiation between pairs of populations, we calculated the overall  $F_{ST}$  (Weir and Cockerham 1984) in Genodive v1.06 (Meirmans and Van Tienderen 2004) using a subset of 2000 randomly selected SNPs. Additionally, to assess the contribution of regional and micro-spatial distributions of samples on the genetic variance, we conducted a hierarchical

analysis of molecular variance (AMOVA) (Excoffier et al. 1992) in Genodive. We used 10000 permutations to assess the statistical significance of  $F_{ST}$  and AMOVA.

# **Genomic targets of selection**

To search for footprints of selection in the genome of *An. funestus*, we examined the distribution of genetic diversity, allele frequency spectrum and genetic differentiation on RAD loci located on mapped scaffolds. We computed the pairwise nucleotide diversity ( $\theta \pi$ ), the Watterson's estimator of segregating sites ( $\theta w$ ) and Tajima's  $D$  with ANGSD v 0.612 (Korneliussen et al. 2014). This program estimates the genetic diversity and Site Frequency Spectrum (SFS) statistics using genotype likelihoods without SNP calling thereby alleviating the uncertainty and biases associated with SNP calling in low coverage Next Generation Sequencing (Korneliussen et al. 2013). To gain genome-wide view and identify outliers regions of diversity and Tajima's  $D$ , average values of these metrics were plotted in non-overlapping 90-kb windows along mapped scaffolds that we previously ordered and concatenated into "pseudo-chromosomes" corresponding to different *An. funestus* chromosome arms.  $F_{ST}$  values per SNP locus were also calculated with the *populations* program in *Stacks* and plotted across the pseudo-chromosomes. To identify  $F_{ST}$  outliers that are likely genomic regions under strong selection, we used both empirical and model-based approaches. First, loci above the top 1% of the empirical distribution were identified as putative outliers of  $F_{ST}$ . Second, we used the coalescence-based method FDIST2 (Beaumont and Nichols 1996) as implemented in LOSITAN (Antao et al. 2008) to identify loci with unusually low or high  $F_{ST}$  values compared to neutral expectations (outlier of  $F_{ST}$ ). The mean neutral  $F_{ST}$  across all



SNPs in the data set was approximated by choosing the “neutral mean  $F_{ST}$  option” with 99% confidence interval in LOSITAN. We ran LOSITAN with 100000 simulations and assumed a False Discovery Rate (FDR) of 0.1 to minimize the number of false positives. Estimates of  $F_{ST}$  are affected by within-population diversity, which can confound assessments of population divergence (Cruickshank and Hahn 2014). It has been suggested that the use of several divergence metrics including the  $d_{xy}$  provides a more reliable approach to examine the genetic divergence among populations (Noor and Bennett 2009; Cruickshank and Hahn 2014). We estimated the absolute sequence divergence ( $d_{xy}$ ) and the proportion of fixed differences between populations ( $d_f$ ) using ngsTools (Fumagalli et al. 2014) and we derived and plotted average values across non-overlapping 10-kb windows along pseudochromosomes in R.

### **Demographic history of *An. funestus***

We used the diffusion approximation method implemented in the software package *∂a∂i* v 1.6.3 (Gutenkunst et al. 2009) to infer the demographic history of *An. funestus* from Site Frequency Spectrum (SFS). Different demographic histories leave distinct signatures in SNPs across the genome. *∂a∂i* applies composite likelihoods to evaluate how well the spectrum of allele frequencies fit different simple or compound demographic scenarios. Using 9412 filtered SNPs, we fitted four alternative one-population models (*neutral*, *growth*, *two-epoch*, *bottle-growth*), describing simple demographic scenarios without migration or recombination events, to the folded allele frequency spectrum of our samples. We chose the best model as the one with the highest composite log likelihood, the lowest Akaike

706 Information Criterion (AIC) and the lowest uncorrelated residuals. We used the  
707 built-in bootstrap function implemented in *adabi* to derive 95% bootstrap confidence  
708 intervals for the different demographic parameters.

709    **Acknowledgements**

710    Funding for this project was provided by the University of California Riverside and

711    NIH grants 1R01AI113248 and 1R21AI115271 to BJW.

712 **Author contributions**

713 Conceived and designed the experiments: CF CK BJW. Performed the experiments:

714 CF CK BJW. Analyzed the data: CF CK BJW. Wrote the paper: CF CK BJW.

# References

- Akhunov ED, Akhunova AR, Anderson OD, Anderson J a, Blake N, Clegg MT, Coleman-Derr D, Conley EJ, Crossman CC, Deal KR, et al. 2010. Nucleotide diversity maps reveal variation in diversity among wheat genomes and chromosomes. BMC Genomics 11:702.
- Andersen EC, Gerke JP, Shapiro J a, Crissman JR, Ghosh R, Bloom JS, Félix M-A, Kruglyak L. 2012. Chromosome-scale selective sweeps shape *Caenorhabditis elegans* genomic diversity. Nat. Genet. 44:285–290.
- Andrew RL, Rieseberg LH. 2013. Divergence is focused on few genomic regions early in speciation: incipient speciation of sunflower ecotypes. Evolution 67:2468–2482.
- Antao T, Lopes A, Lopes RJ, Beja-Pereira A, Luikart G. 2008. LOSITAN: a workbench to detect molecular adaptation based on a *Fst*-outlier method. BMC Bioinformatics 9:323.
- Ayala D, Fontaine MC, Cohuet A, Fontenille D, Vitalis R, Simard F. 2011. Chromosomal inversions, natural selection and adaptation in the malaria vector *Anopheles funestus*. Mol. Biol. Evol. 28:745–758.
- Ayala FJ, Coluzzi M. 2005. Chromosome speciation: humans, *Drosophila*, and mosquitoes. Proc. Natl. Acad. Sci. U. S. A. 102 Suppl :6535–6542.
- Beaumont MA, Nichols RA. 1996. Evaluating loci for use in the genetic analysis of population structure. Proc. R. Soc. B Biol. Sci. 263:1619–1626.
- Bowen HL. 2013. Impact of a mass media campaign on bed net use in Cameroon. Malar. J. 12:36.

738 Catchen J, Hohenlohe P a, Bassham S, Amores A, Cresko W. 2013. Stacks: An analysis  
739 tool set for population genomics. *Mol. Ecol.* 22:3124–3140.

740 Chang H-H, Hartl DL. 2014. Recurrent bottlenecks in the malaria life cycle obscure  
741 signals of positive selection. *Parasitology*:1–10.

742 Cheng C, White BJ, Kamdem C, Mockaitis K, Costantini C, Hahn MW, Besansky NJ.  
743 2012. Ecological genomics of *Anopheles gambiae* along a latitudinal cline: a  
744 population-resequencing approach. *Genetics* 190:1417–1432.

745 Coetzee M, Koekemoer L. 2013. Molecular Systematics and Insecticide Resistance in  
746 the Major African Malaria Vector *Anopheles funestus*. *Annu. Rev. Entomol.*

747 Cohuet A, Dia I, Simard F, Raymond M, Rousset F, Antonio-Nkondjio C, Awono-  
748 Ambene PH, Wondji CS, Fontenille D. 2005. Gene flow between chromosomal  
749 forms of the malaria vector *Anopheles funestus* in Cameroon, Central Africa,  
750 and its relevance in malaria fighting. *Genetics* 169:301–311.

751 Cohuet A, Simard F, Toto J-C, Kengne P, Coetzee M, Fontenille D. 2003. Species  
752 identification within the *Anopheles funestus* group of malaria vectors in  
753 Cameroon and evidence for a new species. *Am. J. Trop. Med. Hyg.* 69:200–205.

754 Coluzzi M, Sabatini A, Torre A, Angela M, Deco D, Petrarca V. 2002. A Polytene  
755 Chromosome Analysis of the *Anopheles gambiae* Species Complex. *Science* (80-  
756 ). 298:1415–1419.

757 Comeron JM, Williford a, Kliman RM. 2008. The Hill-Robertson effect: evolutionary  
758 consequences of weak selection and linkage in finite populations. *Heredity*  
759 (Edinb). 100:19–31.

760 Corbett-Detig RB, Hartl DL. 2012. Population Genomics of Inversion Polymorphisms

761 in *Drosophila melanogaster*. PLoS Genet. 8.

762 Cruickshank TE, Hahn MW. 2014. Reanalysis suggests that genomic islands of  
763 speciation are due to reduced diversity, not reduced gene flow. Mol. Ecol.  
764 23:3133–3157.

765 Cutter AD, Choi JY. 2010. Natural selection shapes nucleotide polymorphism across  
766 the genome of the nematode *Caenorhabditis briggsae* Natural selection shapes  
767 nucleotide polymorphism across the genome of the nematode *Caenorhabditis*  
768 *briggsae*. Genome Res.:1103–1111.

769 Danecek P, Auton A, Abecasis G, Albers C a., Banks E, DePristo M a., Handsaker RE,  
770 Lunter G, Marth GT, Sherry ST, et al. 2011. The variant call format and VCFtools.  
771 Bioinformatics 27:2156–2158.

772 Davey JW, Hohenlohe P a, Etter PD, Boone JQ, Catchen JM, Blaxter ML. 2011.  
773 Genome-wide genetic marker discovery and genotyping using next-generation  
774 sequencing. Nat. Rev. Genet. 12:499–510.

775 Derua Y a, Alifrangis M, Hosea KM, Meyrowitsch DW, Magesa SM, Pedersen EM,  
776 Simonsen PE. 2012. Change in composition of the *Anopheles gambiae* complex  
777 and its possible implications for the transmission of malaria and lymphatic  
778 filariasis in north-eastern Tanzania. Malar. J. 11:188.

779 Dia I, Guelbeogo M, Ayala D. 2013. Advances and Perspectives in the Study of the  
780 Malaria Mosquito *Anopheles funestus*.

781 Donnelly MJ, Licht MC, Lehmann T. 2001. Evidence for recent population expansion  
782 in the evolutionary history of the malaria vectors *Anopheles arabiensis* and  
783 *Anopheles gambiae*. Mol. Biol. Evol. 18:1353–1364.

784 Earl DA, VonHoldt BM. 2012. STRUCTURE HARVESTER: a website and program for  
785 visualizing STRUCTURE output and implementing the Evanno method. *Conserv.*  
786 *Genet. Resour.* 4.

787 Ellegren H, Smeds L, Burri R, Olason PI, Backström N, Kawakami T, Künstner A,  
788 Mäkinen H, Nadachowska-Brzyska K, Qvarnström A, et al. 2012. The genomic  
789 landscape of species divergence in *Ficedula* flycatchers. *Nature* 491:756–760.

790 Ellegren H. 2009. The different levels of genetic diversity in sex chromosomes and  
791 autosomes. *Trends Genet.* 25:278–284.

792 Ellegren H. 2014. Genome sequencing and population genomics in non-model  
793 organisms. *Trends Ecol. Evol.* 29:51–63.

794 Evanno G, Goudet J, Regnaut S. 2005. Detecting the number of clusters of individuals  
795 using the software structure: a simulation study. *Mol. Ecol.* 14:2611–2620.

796 Excoffier L, Smouse PE, Quattro JM. 1992. Analysis of molecular variance inferred  
797 from metric distances among DNA haplotypes: Application to human  
798 mitochondrial DNA restriction data. *Genetics* 131:479–491.

799 Feder JL, Roethele JB, Filchak K, Niedbalski J, Romero-Severson J. 2003. Evidence for  
800 inversion polymorphism related to sympatric host race formation in the apple  
801 maggot fly, *Rhagoletis pomonella*. *Genetics* 163:939–953.

802 Fouet C, Gray E, Besansky NJ, Costantini C. 2012. Adaptation to aridity in the malaria  
803 mosquito *Anopheles gambiae*: chromosomal inversion polymorphism and body  
804 size influence resistance to desiccation. *PLoS One* 7:e34841.

805 Fumagalli M, Vieira FG, Linderöth T. 2014. ngsTools: methods for population  
806 genetics analyses from Next-Generation Sequencing data. *Bioinformatics*.



807 Gagnaire P-A, Pavey S a, Normandeau E, Bernatchez L. 2013. The genetic  
808 architecture of reproductive isolation during speciation-with-gene-flow in lake  
809 whitefish species pairs assessed by RAD sequencing. *Evolution* 67:2483–2497.

810 Gillies MT, Coetzee M. 1987. A supplement to the Anophelinae of Africa south of the  
811 Sahara. Johannesburg: The South African Institute for Medical Research

812 Gillies MT, De Meillon B. 1968. The Anophelinae of Africa South of the Sahara.  
813 Second Edi. Johannesburg: Publications of the South African Institute for  
814 Medical Research

815 Gutenkunst RN, Hernandez RD, Williamson SH, Bustamante CD. 2009. Inferring the  
816 joint demographic history of multiple populations from multidimensional SNP  
817 frequency data. *PLoS Genet.* 5:e1000695.

818 Hoffmann A a, Rieseberg LH. 2008. Revisiting the Impact of Inversions in Evolution:  
819 From Population Genetic Markers to Drivers of Adaptive Shifts and Speciation?  
820 *Annu. Rev. Ecol. Evol. Syst.* 39:21–42.

821 Hohenlohe P a, Bassham S, Etter PD, Stiffler N, Johnson E a, Cresko W a. 2010.  
822 Population genomics of parallel adaptation in threespine stickleback using  
823 sequenced RAD tags. *PLoS Genet.* 6:e1000862.

824 Huber CD, Nordborg M, Hermisson J, Hellmann I. 2014. Keeping It Local: Evidence  
825 for Positive Selection in Swedish *Arabidopsis thaliana*. *Mol. Biol. Evol.* 31:3026–  
826 3039.

827 Jakobsson M, Rosenberg N. 2007. CLUMPP: a cluster matching and permutation  
828 program for dealing with multimodality in analysis of population structure.  
829 *Bioinformatics* 23:1801–1806.

830 Jombart T. 2008. adegenet: a R package for the multivariate analysis of genetic  
831 markers. *Bioinformatics* 24:1403–1405.

832 Kamdem C, Fouet C, Gamez S, White BJ. 2016. Pollutants and insecticides drive local  
833 adaptation in African malaria mosquitoes. *bioRxiv*.

834 Kamdem C, Tene Fossog B, Simard F, Etouna J, Ndo C, Kengne P, Boussès P, Etoa F-X,  
835 Awono-Ambene P, Fontenille D, et al. 2012. Anthropogenic Habitat Disturbance  
836 and Ecological Divergence between Incipient Species of the Malaria Mosquito  
837 *Anopheles gambiae*. *PLoS One* 7:e39453.

838 Keightley PD, Pinharanda A, Ness RW, Simpson F, Dasmahapatra KK, Mallet J, Davey  
839 JW, Jiggins CD. 2015. Estimation of the Spontaneous Mutation Rate in  
840 *Heliconius melpomene*. *Mol. Biol. Evol.* 32:239–243.

841 Kirkpatrick M, Barton N. 2006. Chromosome inversions, local adaptation and  
842 speciation. *Genetics* 173:419–434.

843 Kirkpatrick M. 2010. How and why chromosome inversions evolve. *PLoS Biol.* 8.

844 Korneliussen T, Albrechtsen A, Nielsen R. 2014. ANGSD: Analysis of Next Generation  
845 Sequencing Data. *BMC Bioinformatics* 15:356.

846 Korneliussen TS, Moltke I, Albrechtsen A, Nielsen R. 2013. Calculation of Tajima's D  
847 and other neutrality test statistics from low depth next-generation sequencing  
848 data. *BMC Bioinformatics* 14:289.

849 Kulathinal RJ, Stevison LS, Noor MAF. 2009. The genomics of speciation in  
850 *Drosophila*: Diversity, divergence, and introgression estimated using low-  
851 coverage genome sequencing. *PLoS Genet.* 5.

852 Lawniczak MKN, Emrich SJ, Holloway a K, Regier a P, Olson M, White B, Redmond S,

853 Fulton L, Appelbaum E, Godfrey J, et al. 2010. Widespread divergence between  
854 incipient *Anopheles gambiae* species revealed by whole genome sequences.  
855 *Science* 330:512–514.

856 Lischer HEL, Excoffier L. 2012. PGDSpider: An automated data conversion tool for  
857 connecting population genetics and genomics programs. *Bioinformatics*  
858 28:298–299.

859 Lohse K, Clarke M, Ritchie MG, Etges WJ. 2015. Genome-wide tests for introgression  
860 between cactophilic *Drosophila* implicate a role of inversions during speciation.  
861 *Evolution* (N. Y). 69:1178–1190.

862 Marsden CD, Lee Y, Kreppel K, Weakley A, Cornel A, Ferguson HM, Eskin E, Lanzaro  
863 GC. 2014. Diversity, Differentiation, and Linkage Disequilibrium: Prospects for  
864 Association Mapping in the Malaria Vector *Anopheles arabiensis*. *G3*  
865 (Bethesda). 4:121–131.

866 McGaugh SE, Noor M a F. 2012. Genomic impacts of chromosomal inversions in  
867 parapatric *Drosophila* species. *Philos. Trans. R. Soc. Lond. B. Biol. Sci.* 367:422–  
868 429.

869 Meirmans P, Van Tienderen P. 2004. GENOTYPE and GENODIVE: two programs for  
870 the analysis of genetic diversity of asexual organisms. *Mol. Ecol. Notes* 4:792–  
871 794.

872 Michel a. P, Ingrassi MJ, Schemerhorn BJ, Kern M, Le Goff G, Coetzee M, Elissa N,  
873 Fontenille D, Vulule J, Lehmann T, et al. 2005. Rangewide population genetic  
874 structure of the African malaria vector *Anopheles funestus*. *Mol. Ecol.* 14:4235–  
875 4248.

876 Moiroux N, Gomez MB, Pennetier C, Elanga E, Djènontin A, Chandre F, Djègbé I, Guis  
877 H, Corbel V. 2012. Changes in anopheles funestus biting behavior following  
878 universal coverage of long-lasting insecticidal nets in benin. J. Infect. Dis.  
879 206:1622–1629.

880 Mwangangi JM, Mbogo CM, Orindi BO, Muturi EJ, Midega JT, Nzovu J, Gatakaa H,  
881 Githure J, Borgemeister C, Keating J, et al. 2013. Shifts in malaria vector species  
882 composition and transmission dynamics along the Kenyan coast over the past  
883 20 years. Malar. J. 12:13.

884 Neafsey DE, Lawniczak MKN, Park DJ, Redmond SN, Coulibaly MB, Traoré SF, Sagnon  
885 N, Costantini C, Johnson C, Wiegand RC, et al. 2010. SNP genotyping defines  
886 complex gene-flow boundaries among African malaria vector mosquitoes.  
887 Science 330:514–517.

888 Neafsey DE, Waterhouse RM, Abai MR, Aganezov SS, Alekseyev MA, Allen JE, Amon J,  
889 Arca B, Arensburger P, Artemov G, et al. 2015. Highly evolvable malaria vectors:  
890 The genomes of 16 Anopheles mosquitoes. Science (80-. ). 347:1258522–  
891 1258522.

892 Nielsen R, Paul JS, Albrechtsen A, Song YS. 2011. Genotype and SNP calling from  
893 next-generation sequencing data. Nat. Rev. Genet. 12:443–451.

894 Noor M a F, Bennett SM. 2009. Islands of speciation or mirages in the desert?  
895 Examining the role of restricted recombination in maintaining species. Heredity  
896 (Edinb). 103:439–444.

897 Nosil P, Feder JL. 2012. Widespread yet heterogeneous genomic divergence. Mol.  
898 Ecol. 21:2829–2832.

899 Nosil P, Feder JL. 2013. Genome evolution and speciation: toward quantitative  
900 descriptions of pattern and process. *Evolution* 67:2461–2467.

901 Nosil P. 2012. *Ecological Speciation*. Oxford Ser.

902 O'Reilly PF, Birney E, Balding DJ. 2008. Confounding between recombination and  
903 selection, and the Ped/Pop method for detecting selection. *Genome Res.*  
904 18:1304–1313.

905 Paradis E, Claude J, Strimmer K. 2004. Analyses of Phylogenetics and Evolution in R  
906 language. *Bioinformatics* 20:289–290.

907 Peterson BK, Weber JN, Kay EH, Fisher HS, Hoekstra HE. 2012. Double Digest  
908 RADseq: An Inexpensive Method for De Novo SNP Discovery and Genotyping in  
909 Model and Non-Model Species. *PLoS One* 7:e37135.

910 Pool JE, Corbett-Detig RB, Sugino RP, Stevens K a., Cardeno CM, Crepeau MW,  
911 Duchon P, Emerson JJ, Saelao P, Begun DJ, et al. 2012. Population Genomics of  
912 Sub-Saharan *Drosophila melanogaster*: African Diversity and Non-African  
913 Admixture. *PLoS Genet.* 8.

914 Pritchard JK, Stephens M, Donnelly P. 2000. Inference of population structure using  
915 multilocus genotype data. *Genetics* 155:945–959.

916 Purcell S, Neale B, Todd-Brown K, Thomas L, Ferreira M, Bender D, Maller J, Sklar P,  
917 de Bakker P, Daly M, et al. 2007. PLINK: a toolset for whole-genome association  
918 and population-based linkage analysis. *Am. J. Hum. Genet.* 81.

919 R Development Core Team. 2014. R: A language and environment for statistical  
920 computing. R Foundation for Statistical Computing, Vienna, Austria

921 Rane AR V, Rako L, Lee SF, Hoffmann A a. 2015. Genomic evidence for role of

inversion 3RP of *Drosophila melanogaster* in facilitating climate change adaptation Abstract : :1–24.

Renaut S, Grassa CJ, Yeaman S, Moyers BT, Lai Z, Kane NC, Bowers JE, Burke JM, Rieseberg LH. 2013. Genomic islands of divergence are not affected by geography of speciation in sunflowers. *Nat. Commun.* 4:1827.

Riehle MM, Guelbeogo WM, Gneme A, Eiglmeier K, Holm I, Bischoff E, Garnier T, Snyder GM, Li X, Markianos K, et al. 2011. A cryptic subgroup of *Anopheles gambiae* is highly susceptible to human malaria parasites. *Science* 331:596–598.

Roesti M, Hendry AP, Salzburger W, Berner D. 2012. Genome divergence during evolutionary diversification as revealed in replicate lake-stream stickleback population pairs. *Mol. Ecol.* 21:2852–2862.

Rosenberg N. 2004. DISTRUCT: a program for the graphical display of population structure. *Mol. Ecol. Resour.* 4:137–138.

Sella G, Petrov D a, Przeworski M, Andolfatto P. 2009. Pervasive natural selection in the *Drosophila* genome? *PLoS Genet.* 5:e1000495.

Service MW. 1993. Mosquito ecology: field sampling methods. (Elsevier Applied Science, London UK, editor.).

Sharakhov I, Braginets O, Grushko O, Cohuet A, Guelbeogo WM, Boccolini D, Weill M, Costantini C, Sagnon N, Fontenille D, et al. 2004. A Microsatellite Map of the African Human Malaria Vector *Anopheles funestus*. *J. Hered.* 95:29–34.

Sharakhova M V, Xia A, Leman SC, Sharakhov I V. 2011. Arm-specific dynamics of chromosome evolution in malaria mosquitoes. *BMC Evol. Biol.* 11:91.

Sinka ME, Bangs MJ, Manguin S, Coetzee M, Mbogo CM, Hemingway J, Patil AP, Temperley WH, Gething PW, Kabaria CW, et al. 2010. The dominant Anopheles vectors of human malaria in Africa, Europe and the Middle East: occurrence data, distribution maps and bionomic précis. *Parasit. Vectors* 3:117.

Thomas CG, Wang W, Jovelín R, Ghosh R, Lomasko T, Trinh Q, Kruglyak L, Stein LD, Cutter AD. 2015. Full-genome evolutionary histories of selfing , splitting , and selection in *Caenorhabditis*. :667–678.

Via S. 2012. Divergence hitchhiking and the spread of genomic isolation during ecological speciation-with-gene-flow. *Philos. Trans. R. Soc. B Biol. Sci.* 367:451–460.

Weir BS, Cockerham CC. 1984. Estimating F-statistics for the analysis of population structure. *Evolution* (N. Y). 38:1358–1370.

Wilson Sayres MA, Lohmueller KE, Nielsen R. 2014. Natural Selection Reduced Diversity on Human Y Chromosomes. *PLoS Genet.* 10.

Wu TD, Nacu S. 2010. Fast and SNP-tolerant detection of complex variants and splicing in short reads. *Bioinformatics* 26:873–881.

## Figure legends

**Figure 1:** Geographic origin and genetic relatedness of *An. funestus* samples in Cameroon. (A) Map of sampling locations showing the 28 sites surveyed (small circles) and the two villages (large orange and green squares) where *An. funestus* samples were collected. The line in the middle of the map indicates an arbitrary delimitation of the distribution ranges of the two ecotypes found in Cameroon (Cohuet et al. 2005; Ayala et al. 2011). (B), (C) and (D) Population genetic structure as revealed by neighbor-joining tree, PCA and Bayesian clustering (STRUCTURE). The percentage of variance explained is indicated on each PCA axis. (E) and (F) Confirmation of the presence of two ecotypes with DAPC and the delta k method of Evanno et al. The decrease of the Bayesian Information Criterion (BIC) (DAPC) and the increase of delta k as a function of the number of k indicate a subdivision of *An. funestus* into two 2-3 genetic clusters.

**Figure 2:** Estimates of pairwise population differentiation ( $F_{ST}$ ) based on 10687 SNPs ordered by position along “pseudochromosomes” representing the five chromosomal arms of *An. funestus*.  $F_{ST}$  values above the red line are above the 99<sup>th</sup> percent of the empirical distribution. Arrows indicate the genomic coordinates of the 3Ra and 3Rb inversions.

**Figure 3:** Genome-wide distribution of  $d_{xy}$  and fixed differences ( $d_f$ ) in *An. funestus* among Mfou and Tibati populations. Estimates are smoothed with kernel smoothing and plotted along the five chromosomal arms.

**Figure 4:** Population genetic structure revealed by each chromosomal arm and by four polymorphic chromosomal inversions (2Rh, 3Ra, 3Rb and 3Rd).



987 **Figure 5:** Estimates of nucleotide diversity ( $\theta\pi$  and  $\theta_w$ ) and allele frequency  
 988 spectrum (Tajima's  $D$ ) across 90-kb non-overlapping windows illustrating the  
 989 uneven distribution of genetic diversity along the chromosomal arms. The only  
 990 uninverted autosome (2L) is the most polymorphic both in Mfou and Tibati.  
 991 **Figure 6:** Box plot depicting the variation of  $\theta_w$  among chromosomes in Mfou and  
 992 Tibati.

## 993    **Supplemental Figure Legends**

994    **Figure S1:** Positions of the 104 scaffolds placed on the physical map of *An. funestus*  
 995    indicated by grey rectangles below the chromosomes (modified from Sharakhov *et*  
 996    *al.* 2004).

997    **Figure S2:** Distribution of the average depth of sequencing coverage along mapped  
 998    scaffolds.

999

## Tables

**Table 1:** Parameters of the best-fitted demographic model in  $\partial a \partial i$  for the genome-wide and chromosome-specific diversity in Mfou and Tibati populations.

| Population    | Chromosome | Best model       | Log Likelihood | Final population size <sup>b</sup> (95% CI) |                | Time <sup>c</sup> (95% CI) |              |
|---------------|------------|------------------|----------------|---------------------------------------------|----------------|----------------------------|--------------|
| <i>Tibati</i> | Autosomes  | <i>Growth</i>    | -88.8          | 77.6                                        | (51.8 - 138.1) | 3.8                        | (1.8 - 8.0)  |
|               | 2R         | <i>Growth</i>    | -52.93         | 92.5                                        | (54.3 - 187.2) | 5.3                        | (2.4 - 11.9) |
|               | 2L         | <i>Growth</i>    | -45.86         | 141.4                                       | (69.2 - 199.3) | 4.5                        | (2.0 - 10.1) |
|               | 3R         | <i>Growth</i>    | -47.35         | 38.8                                        | (24.8 - 87.9)  | 3.8                        | (0.6 - 3.9)  |
|               | 3L         | <i>Growth</i>    | -42.52         | 83                                          | (47.4 - 185.1) | 4.6                        | (1.3 - 12.3) |
| <i>Mfou</i>   | Autosomes  | <i>Two-epoch</i> | -84.7          | 13.6                                        | (12.2 - 15.7)  | 1.4                        | (1.2 - 1.7)  |
|               | 2R         | <i>Two-epoch</i> | -56.45         | 11.4                                        | (8.4 - 17.1)   | 1.5                        | (1.0 - 2.8)  |
|               | 2L         | <i>Two-epoch</i> | -44.27         | 26.9                                        | (16.4 - 52.5)  | 2.2                        | (1.1 - 4.8)  |
|               | 3R         | <i>Two-epoch</i> | -44.65         | 15.1                                        | (10.7 - 23.4)  | 1.2                        | (0.8 - 2.2)  |
|               | 3L         | <i>Two-epoch</i> | -41.65         | 19                                          | (5.1 - 36.0)   | 2.2                        | (0.2 - 4.4)  |

<sup>b</sup>Relative to ancestral population size.

<sup>c</sup>Expressed in units 2N<sub>e</sub> generations from start of growth to present

## Supplemental Tables

**Table S1:** Description of *An. funestus* samples included in this study.

| Ecogeographic<br>regions | Sampling<br>locations | Geographic<br>coordinates | Sampling<br>methods |        |    |       | Total | Gender |      |    |
|--------------------------|-----------------------|---------------------------|---------------------|--------|----|-------|-------|--------|------|----|
|                          |                       |                           | HLC-OUT             | HLC-IN | LC | SPRAY |       | Female | Male | NA |
| Savannah                 | Tibati                | 6°28'08"N, 12°37'44"E     | 8                   | 7      | 0  | 32    | 47    | 43     | 4    | 0  |
| Forest                   | Mfou                  | 3°58'00"N, 11°56'00"E     | 2                   | 8      | 22 | 53    | 85    | 55     | 8    | 22 |
|                          | Total                 |                           |                     |        |    |       | 132   | 98     | 12   | 22 |

HLC-OUT, human landing catches performed outdoor; HLC-IN, human landing catches performed indoor; LC, larval collection; SPRAY, spray catches

**Table S2:** Characteristics of the five “pseudochromosomes” of *An. funestus* used for genome scans.

| <b>Chromosome</b> | <b>Number of scaffolds</b> | <b>Total length (bp)</b> | <b>Number of SNPs</b> |
|-------------------|----------------------------|--------------------------|-----------------------|
| 2R                | 30                         | 27 415 570               | 1 587                 |
| 2L                | 18                         | 19 110 819               | 987                   |
| 3R                | 24                         | 15 197 945               | 745                   |
| 3L                | 22                         | 12 545 136               | 652                   |
| X                 | 10                         | 6 812 527                | 296                   |

## Figures

### Figure1

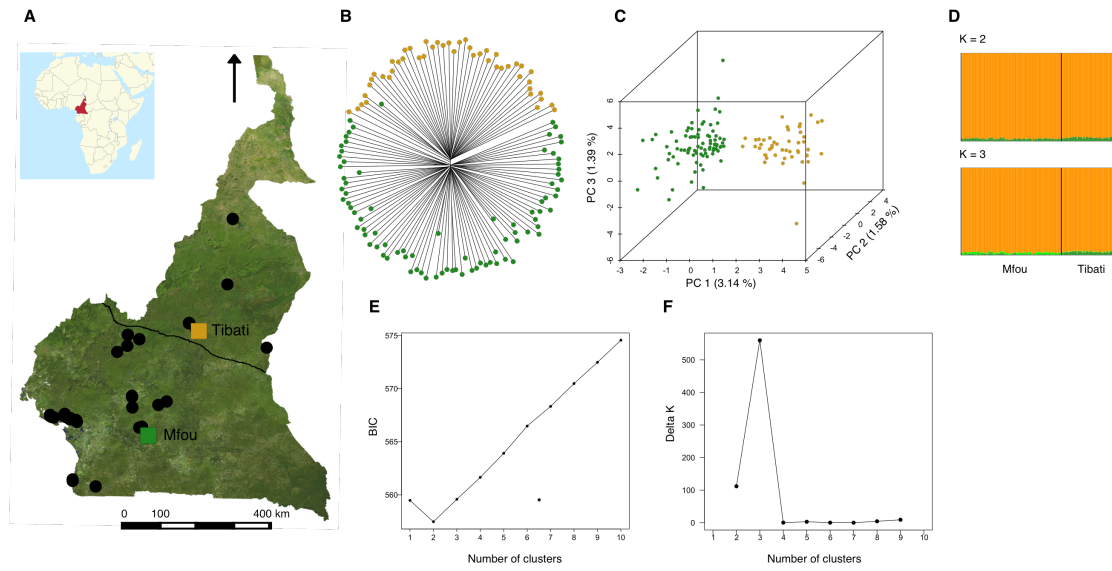

**Figure 2**

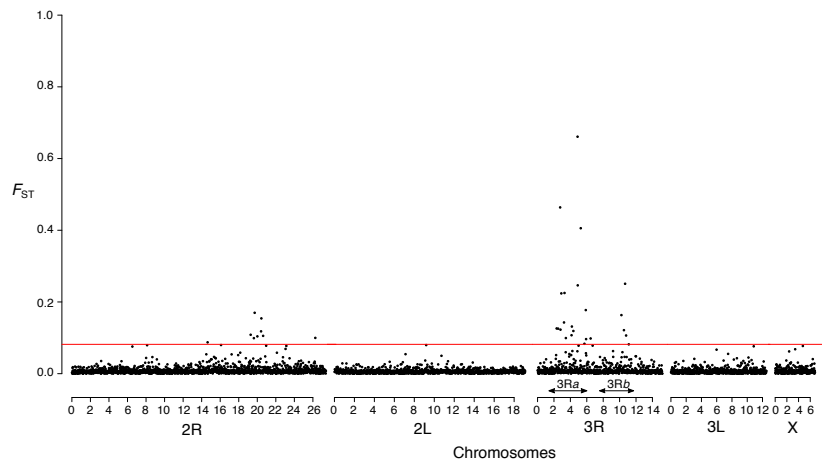

**Figure 3**

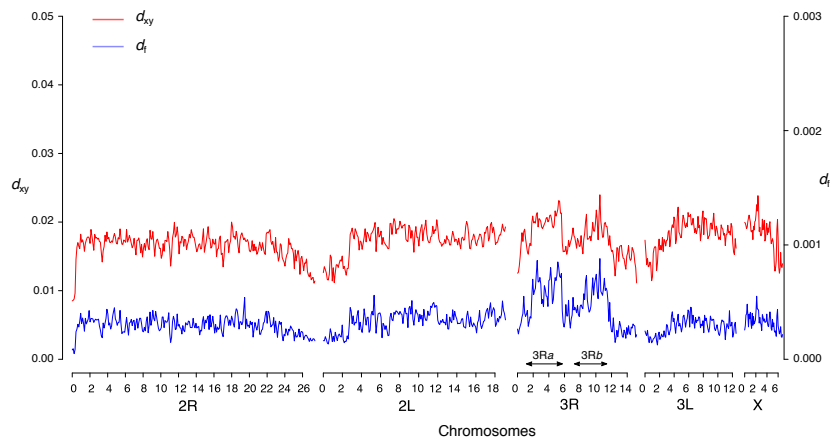



**Figure 4**

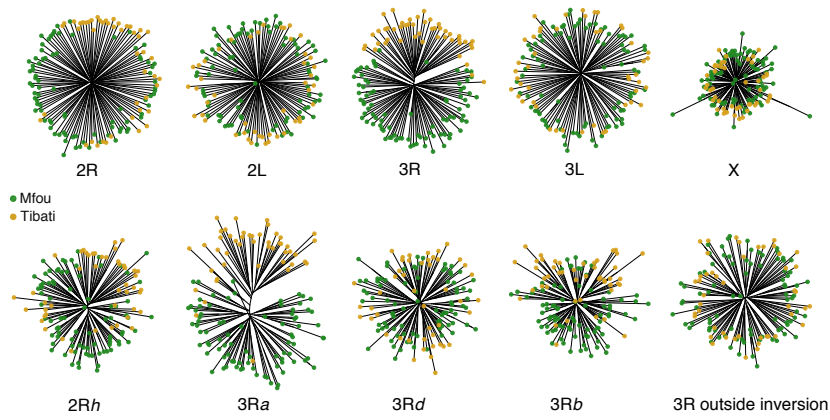

**Figure 5**

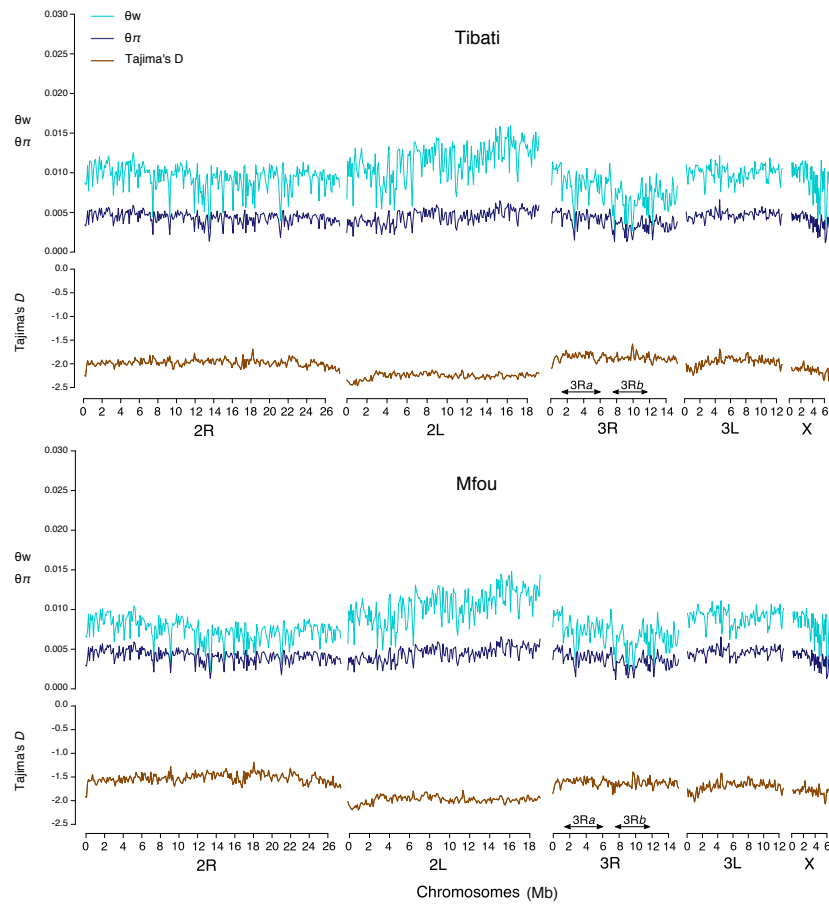

**Figure 6**

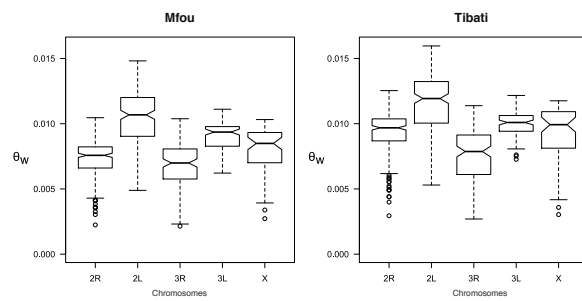

**Figure S1**

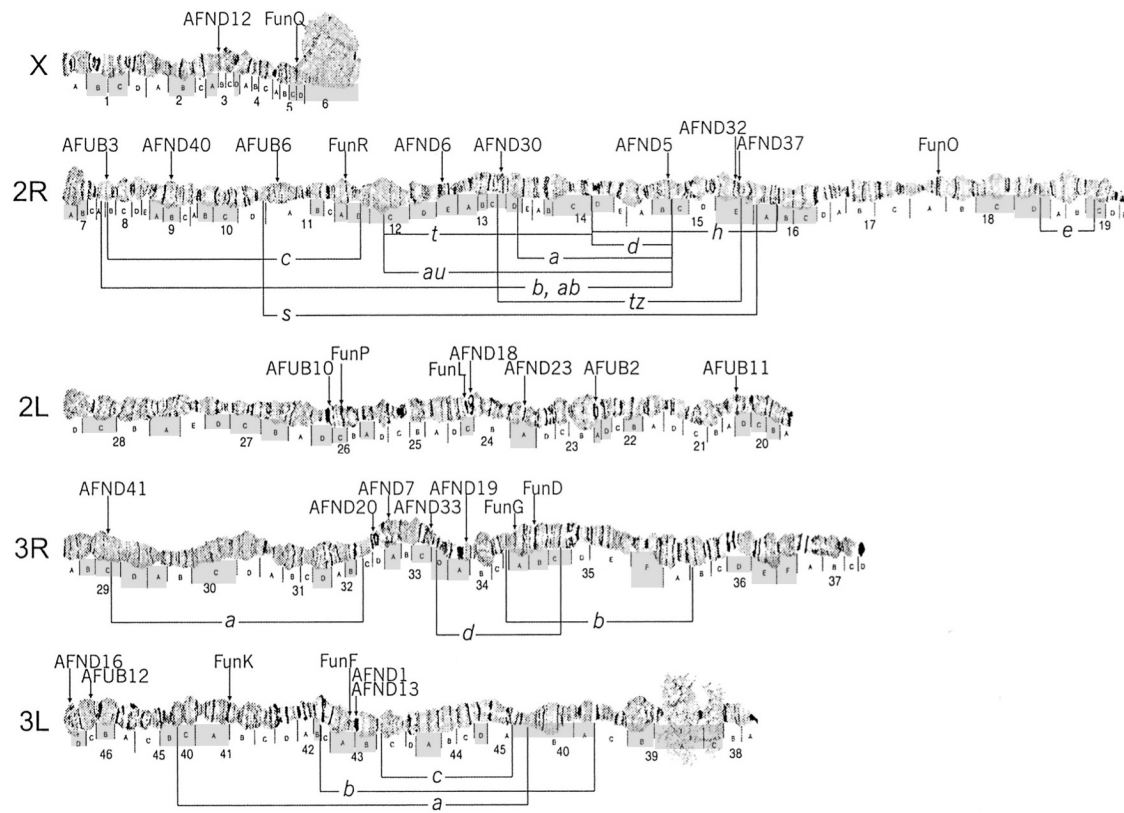

**Figure S2**

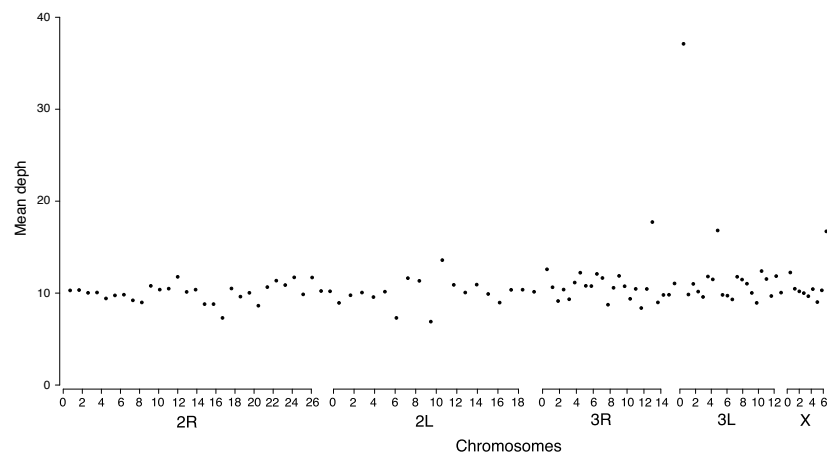

Source: http://biorxiv.org/content/10.1101/068205v1.full.pdf
